# Supplementary material for: Water–food–energy nexus with changing agricultural scenarios in India during recent decades
Source: Copernicus journal article supplement (doi:10.5194/hess-21-3041-2017), 2017-06-26
Supplement: Supplementary file 1 [file hess-21-3041-2017-supplement.pdf]

Supplement of Hydrol. Earth Syst. Sci., 21, 3041–3060, 2017  
<https://doi.org/10.5194/hess-21-3041-2017-supplement>  
© Author(s) 2017. This work is distributed under  
the Creative Commons Attribution 3.0 License.

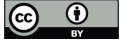

*Supplement of*

## **Water–food–energy nexus with changing agricultural scenarios in India during recent decades**

**Beas Barik et al.**

*Correspondence to:* Subimal Ghosh ([subimal@civil.iitb.ac.in](mailto:subimal@civil.iitb.ac.in))

The copyright of individual parts of the supplement might differ from the CC BY 3.0 License.

**Table S1.** Decadal variation of food grains and major cash crops of India.

|         | Food Grains |        |                           | Major Cash Crops |       |                           |        |      |                           |           |        |                           |
|---------|-------------|--------|---------------------------|------------------|-------|---------------------------|--------|------|---------------------------|-----------|--------|---------------------------|
|         |             |        |                           | Oilseeds         |       |                           | Cotton |      |                           | Sugarcane |        |                           |
| Year    | A           | P      | Area Under Irrigation (%) | A                | P     | Area Under Irrigation (%) | A      | P    | Area Under Irrigation (%) | A         | P      | Area Under Irrigation (%) |
| 1950-51 | 97.32       | 50.82  | 18.1                      | 10.73            | 5.16  | NA                        | 5.88   | 3.04 | 8.2                       | 1.71      | 57.05  | 67.3                      |
| 1960-61 | 115.58      | 82.02  | 19.1                      | 13.77            | 6.98  | 3.3                       | 7.61   | 5.6  | 12.7                      | 2.42      | 110    | 69.3                      |
| 1970-71 | 124.32      | 108.42 | 24.1                      | 16.64            | 9.63  | 7.4                       | 7.61   | 4.76 | 17.3                      | 2.62      | 126.37 | 72.4                      |
| 1980-81 | 126.67      | 129.59 | 29.6                      | 17.6             | 9.37  | 14.5                      | 7.82   | 7.01 | 27.3                      | 2.67      | 154.25 | 81.2                      |
| 1990-91 | 127.84      | 176.39 | 35.1                      | 24.15            | 18.61 | 22.9                      | 7.44   | 9.84 | 32.9                      | 3.69      | 241.05 | 86.9                      |
| 2000-01 | 121.05      | 196.81 | 43.3                      | 22.77            | 18.44 | 23                        | 8.53   | 9.52 | 34.3                      | 4.32      | 295.96 | 92.1                      |
| 2010-11 | 126.67      | 244.49 | 47.8                      | 27.22            | 32.48 | 25.1                      | 11.24  | 33   | 33.8                      | 4.88      | 342.38 | 92.5                      |

**Table S2.** Studies conducted using GRACE over the Indian region

| Reference                                                                                                                                                                                                                                                                  | Case-study Region                                    | Source                                                                                                                                                |
|----------------------------------------------------------------------------------------------------------------------------------------------------------------------------------------------------------------------------------------------------------------------------|------------------------------------------------------|-------------------------------------------------------------------------------------------------------------------------------------------------------|
| Rodell, M., Velicogna, I., and Famiglietti, J. S.: Satellite-based estimates of groundwater depletion in India, <i>Nature</i> , 460, 999–1002, <a href="https://doi.org/10.1038/nature08238">https://doi.org/10.1038/nature08238</a> , 2009.                               | North-West India (Punjab, Haryana, Delhi, Rajasthan) | <a href="http://www.nature.com/nature/journal/v460/n7258/pdf/nature08238.pdf">http://www.nature.com/nature/journal/v460/n7258/pdf/nature08238.pdf</a> |
| Tiwari, V. M., Wahr, J., and Swenson, S.: Dwindling groundwater resources in northern India, from satellite gravity observations, <i>Geophys. Res. Lett.</i> , 36, L18401, <a href="https://doi.org/10.1029/2009GL039401">https://doi.org/10.1029/2009GL039401</a> , 2009. | Indus-Ganga-Brahmaputra Basin.                       | <a href="http://onlinelibrary.wiley.com/doi/10.1029/2009GL039401/epdf">http://onlinelibrary.wiley.com/doi/10.1029/2009GL039401/epdf</a>               |

|                                                                                                                                                                                                                                                                                                                                                                                      |                                                    |                                                                                                                                                                                                                                                                                                                                                                   |
|--------------------------------------------------------------------------------------------------------------------------------------------------------------------------------------------------------------------------------------------------------------------------------------------------------------------------------------------------------------------------------------|----------------------------------------------------|-------------------------------------------------------------------------------------------------------------------------------------------------------------------------------------------------------------------------------------------------------------------------------------------------------------------------------------------------------------------|
| Chen, J., Li, J., Zhang, Z., and Ni, S.: Long-term groundwater variations in Northwest India from satellite gravity measurements, <i>Global Planet. Change</i> , 116, 130–138, <a href="https://doi.org/10.1016/j.gloplacha.2014.02.007">https://doi.org/10.1016/j.gloplacha.2014.02.007</a> , 2014.                                                                                 | North-West India                                   | <a href="http://ac.els-cdn.com/S0921818114000526/1-s2.0-S0921818114000526-main.pdf?_tid=b0e17334-e9d5-11e6-9328-00000aab0f02&amp;acdnt=1486101648_83a007a750a5b266c5a402b016f1bfa2">http://ac.els-cdn.com/S0921818114000526/1-s2.0-S0921818114000526-main.pdf?_tid=b0e17334-e9d5-11e6-9328-00000aab0f02&amp;acdnt=1486101648_83a007a750a5b266c5a402b016f1bfa2</a> |
| Dasgupta, S., Das, I. C., Subramanian, S. K., and Dadhwal, V. K.: Space-based gravity data analysis for groundwater storage estimation in the Gangetic plain, India, <i>Curr. Sci.</i> , 107, 832–844, 2014.                                                                                                                                                                         | Gangetic Plain (Uttar Pradesh, Bihar, West Bengal) | <a href="http://www.currentscience.ac.in/Volumes/107/05/0832.pdf">http://www.currentscience.ac.in/Volumes/107/05/0832.pdf</a>                                                                                                                                                                                                                                     |
| Prakash, S., Gairola, R. M., Papa, F., and Mitra, A. K.: An assessment of terrestrial water storage, rainfall and river discharge over Northern India from satellite data, <i>Curr. Sci.</i> , 107, 1582–1586, 2014.                                                                                                                                                                 | India                                              | <a href="http://www.currentscience.ac.in/Volumes/107/09/1582.pdf">http://www.currentscience.ac.in/Volumes/107/09/1582.pdf</a>                                                                                                                                                                                                                                     |
| Khandu, K., Forootan, E., Schumacher, M., Awange, J. L., and Müller Schmied, H.: Exploring the influence of precipitation extremes and human water use on total water storage (TWS) changes in the Ganges-Brahmaputra-Meghna River Basin, <i>Water Resour. Res.</i> , 52, 2240–2258, <a href="https://doi.org/10.1002/2015WR018113">https://doi.org/10.1002/2015WR018113</a> , 2016. | Ganga-Brahmaputra-Meghna Basin                     | <a href="http://onlinelibrary.wiley.com/doi/10.1002/2015WR018113/epdf">http://onlinelibrary.wiley.com/doi/10.1002/2015WR018113/epdf</a>                                                                                                                                                                                                                           |
| Yi, S., Sun, W., Feng, W., and Chen, J.: Anthropogenic and climate-driven water depletion in Asia, <i>Geophys. Res. Lett.</i> , 43, 9061–9069, <a href="https://doi.org/10.1002/2016GL069985">https://doi.org/10.1002/2016GL069985</a> , 2016.                                                                                                                                       | Asia                                               | <a href="http://onlinelibrary.wiley.com/doi/10.1002/2016GL069985/epdf">http://onlinelibrary.wiley.com/doi/10.1002/2016GL069985/epdf</a>                                                                                                                                                                                                                           |
| Panda, D. K. and Wahr, J.: Spatiotemporal evolution of water storage changes in India from the updated GRACE-derived gravity records, <i>Water Resour. Res.</i> , 52, 135–149, <a href="https://doi.org/10.1002/2015WR017797">https://doi.org/10.1002/2015WR017797</a> , 2016.                                                                                                       | India                                              | <a href="http://onlinelibrary.wiley.com/doi/10.1002/2015WR017797/epdf">http://onlinelibrary.wiley.com/doi/10.1002/2015WR017797/epdf</a>                                                                                                                                                                                                                           |
| Asoka, A., Gleeson, T., Wada, Y., and Mishra, V.: Relative contribution of monsoon precipitation and pumping to changes in groundwater storage in India, <i>Nat. Geosci.</i> , 10, 109–117, <a href="https://doi.org/10.1038/ngeo2869">https://doi.org/10.1038/ngeo2869</a> , 2017.                                                                                                  | India                                              | <a href="http://palgrave.nature.com/ngeo/journal/v10/n2/pdf/ngeo2869.pdf">http://palgrave.nature.com/ngeo/journal/v10/n2/pdf/ngeo2869.pdf</a>                                                                                                                                                                                                                     |

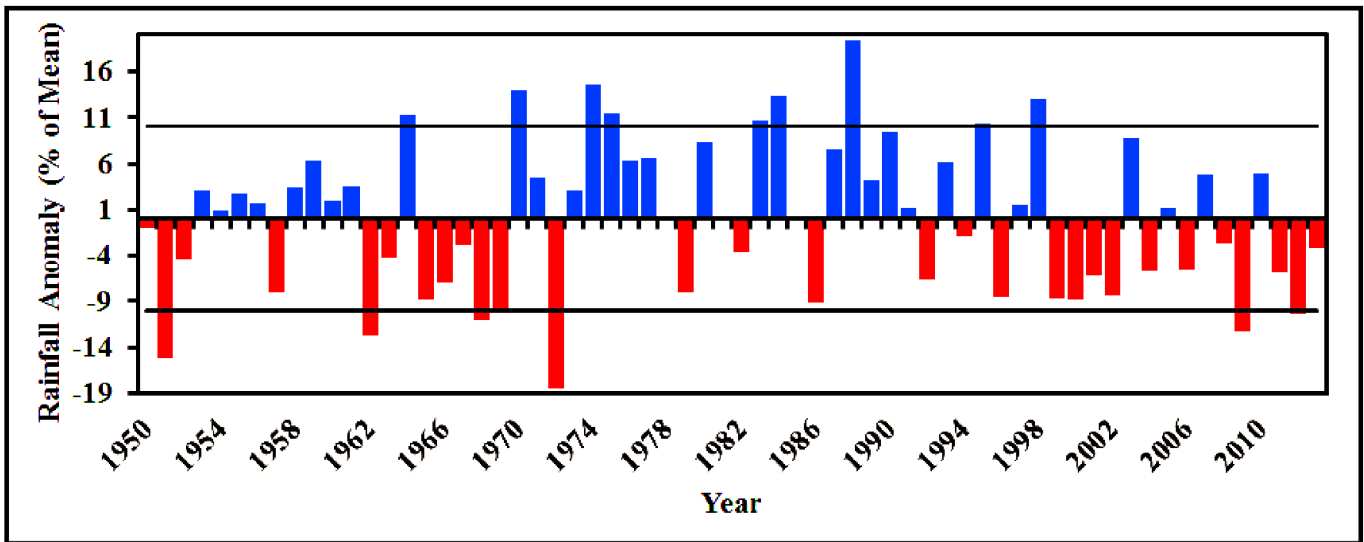

Fig.S1. Anomaly of AIMR computed with respect to its mean for the period from 1950 to 2013.

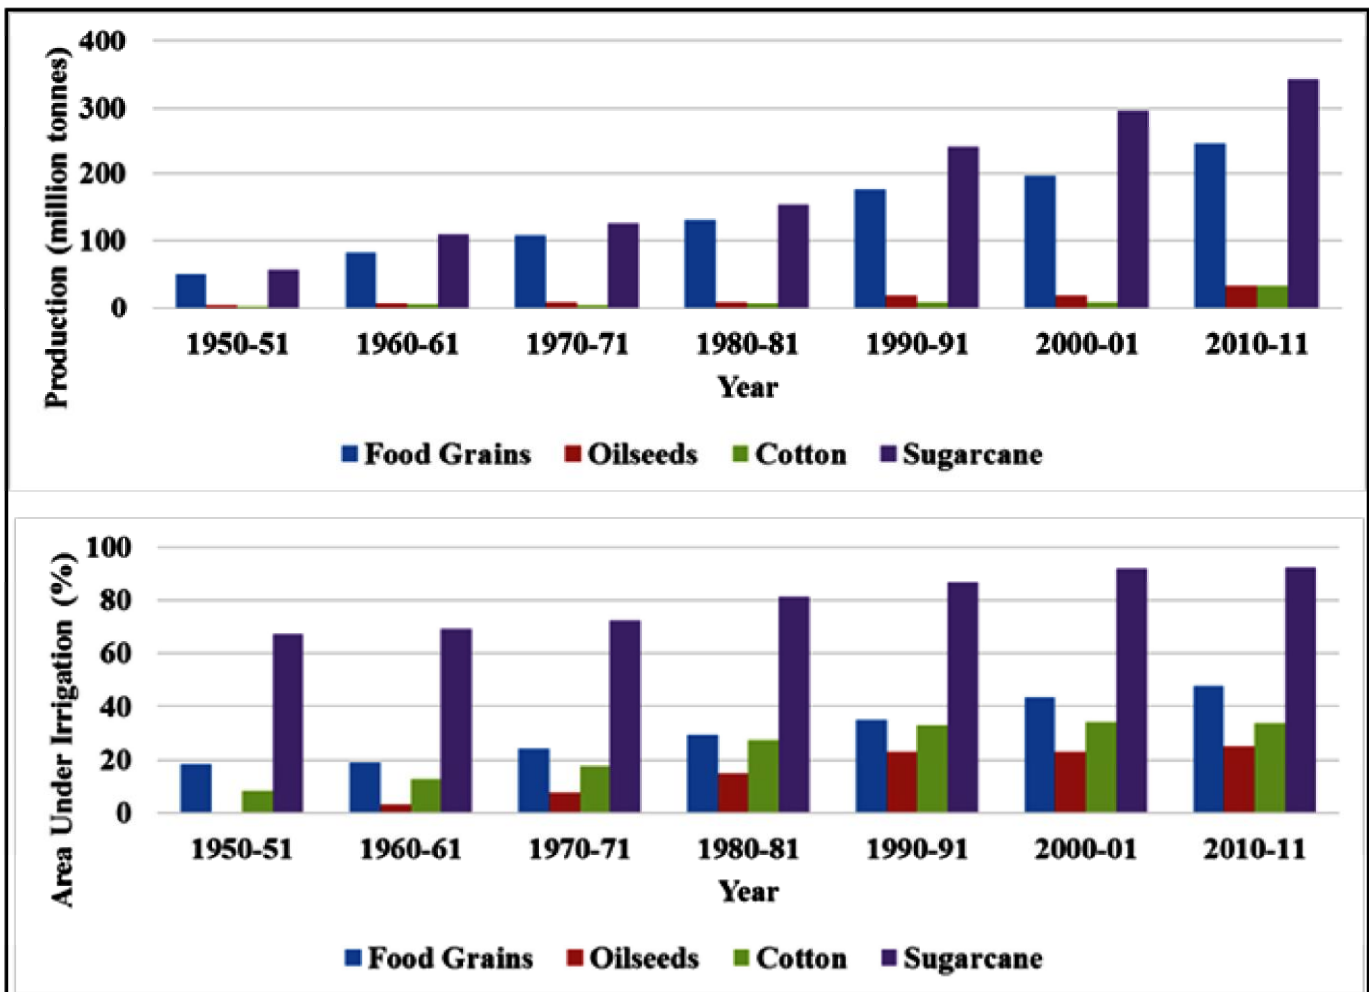

Fig.S2. Varying production (top) and percentage of area under irrigation (bottom) for food grain and cash crops.

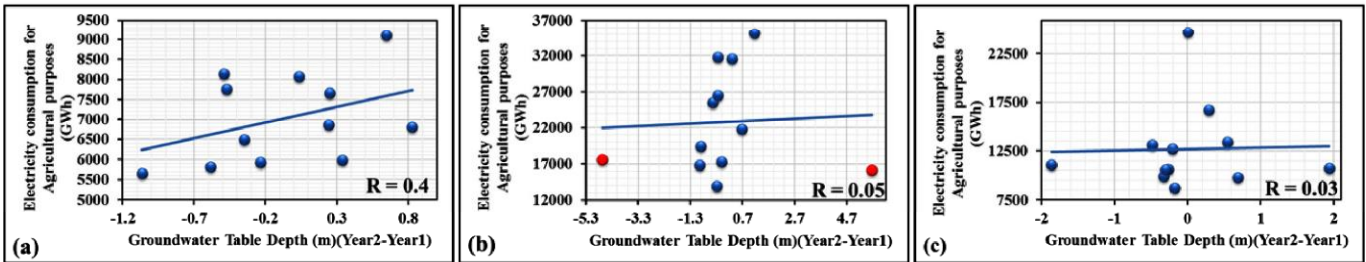

**Fig.S3.** Scatter plots showing the correlation between observed groundwater table depth and agricultural electricity consumption for the three sub-region (a) MGB, (b)NWI and (c)WCI.

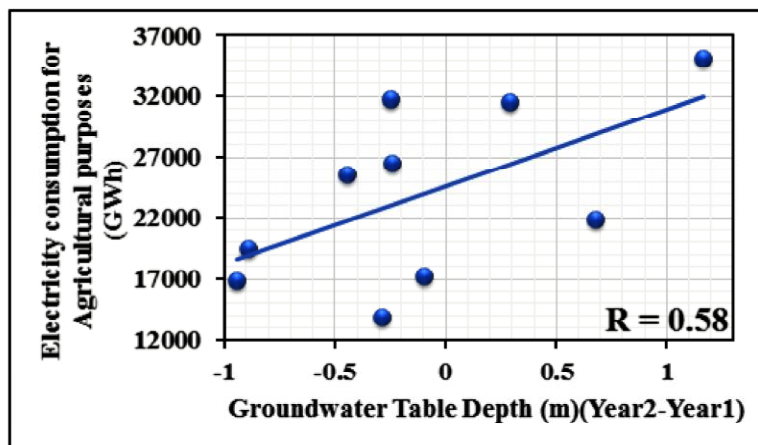

**Fig.S4.** Scatter plot of NWI after removing the outliers

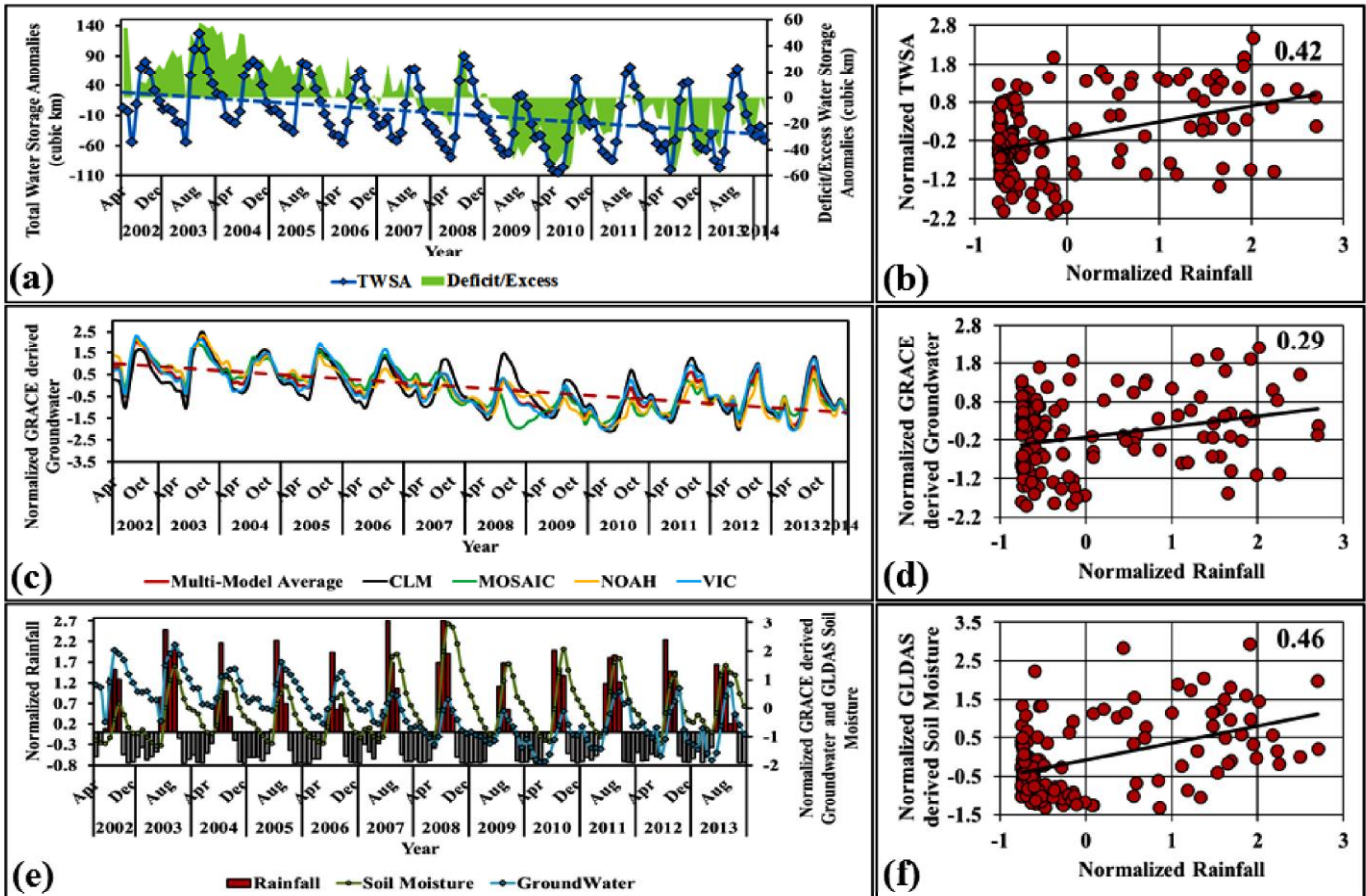

**Fig.S5. Groundwater scenario of Middle Ganga Basin.** (a) GRACE-derived total water storage anomaly. (b) Correlation between Rainfall and TWSA. (c) GRACE-GLDAS-derived groundwater storage anomaly. (d) Correlation between Rainfall and GRACE-derived groundwater storage anomaly. (e) Rainfall, GRACE-derived groundwater anomaly and GLDAS-derived soil moisture. (f) Correlation between Rainfall and GLDAS-derived soil moisture.

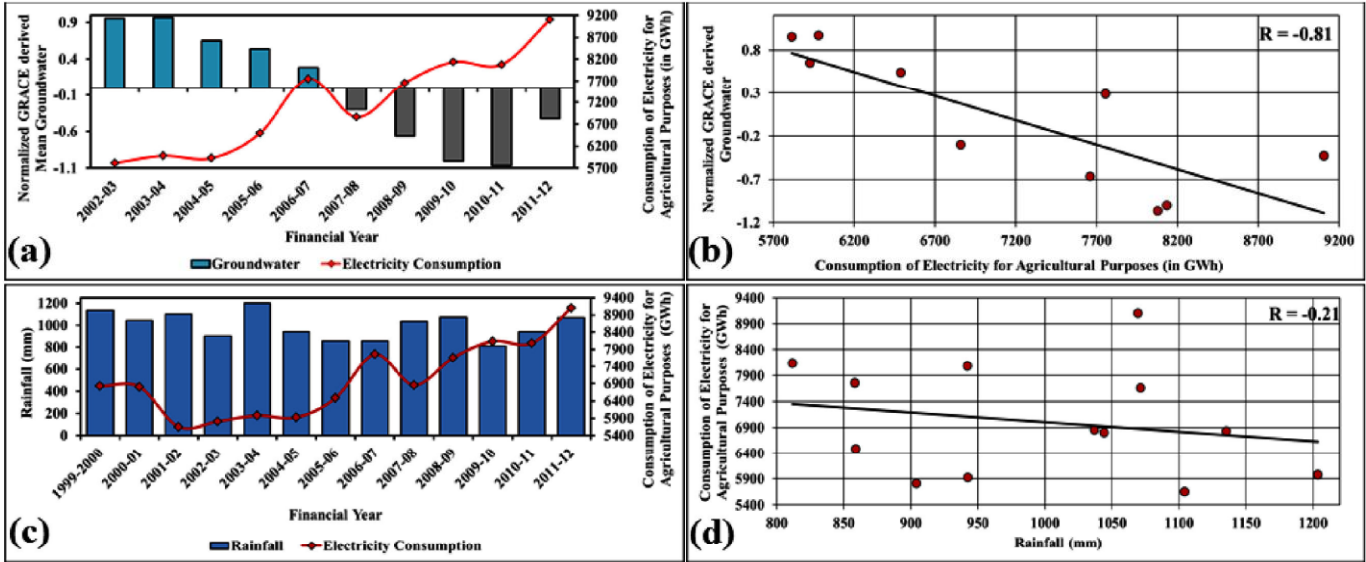

**Fig.S6. Middle-Ganga Basin groundwater storage anomaly and energy consumption.** (a) Electricity consumption for agricultural purpose and groundwater storage. (b) Scatter plot between electricity consumption for agricultural purpose and GRACE-derived groundwater storage anomaly. (c) Consumption of electricity for agricultural purposes and Rainfall. (d) Scatter plot between Rainfall and electricity consumption.

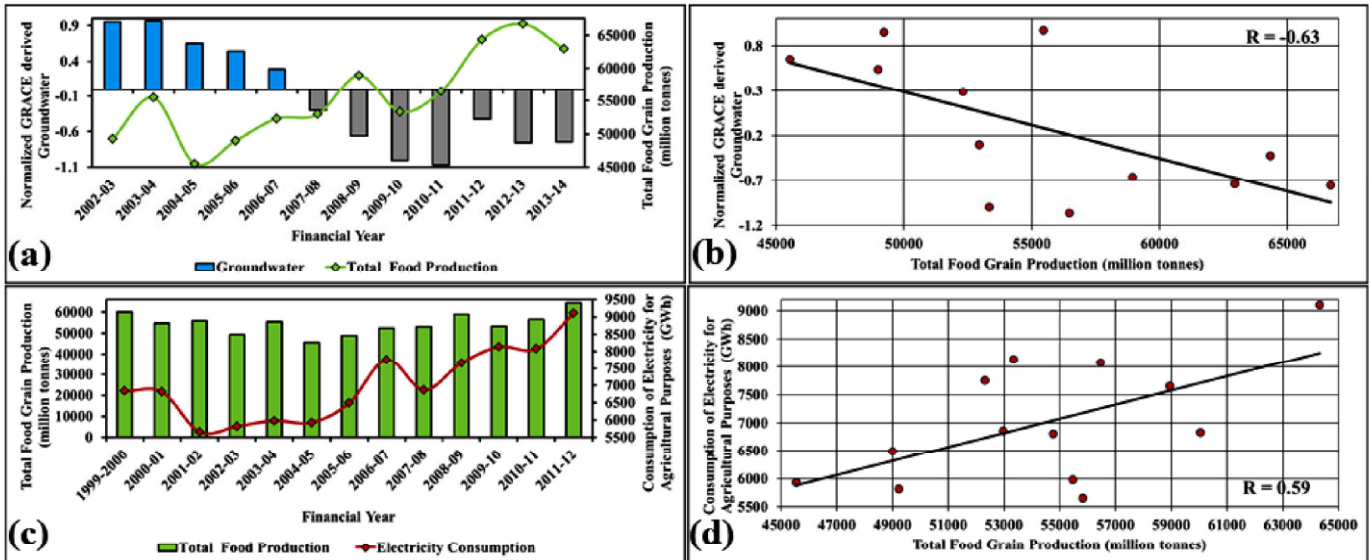

**Fig.S7. Middle-Ganga Basin food-groundwater-energy nexus.** (a) GRACE-derived groundwater storage anomaly and total food production. (b) Scatter plot between GRACE-derived groundwater storage anomaly and total food grain production. (c) Food grain production and electricity consumption for agricultural purposes. (d) Scatter plot between total food grain production and consumption of electricity for agricultural purposes.

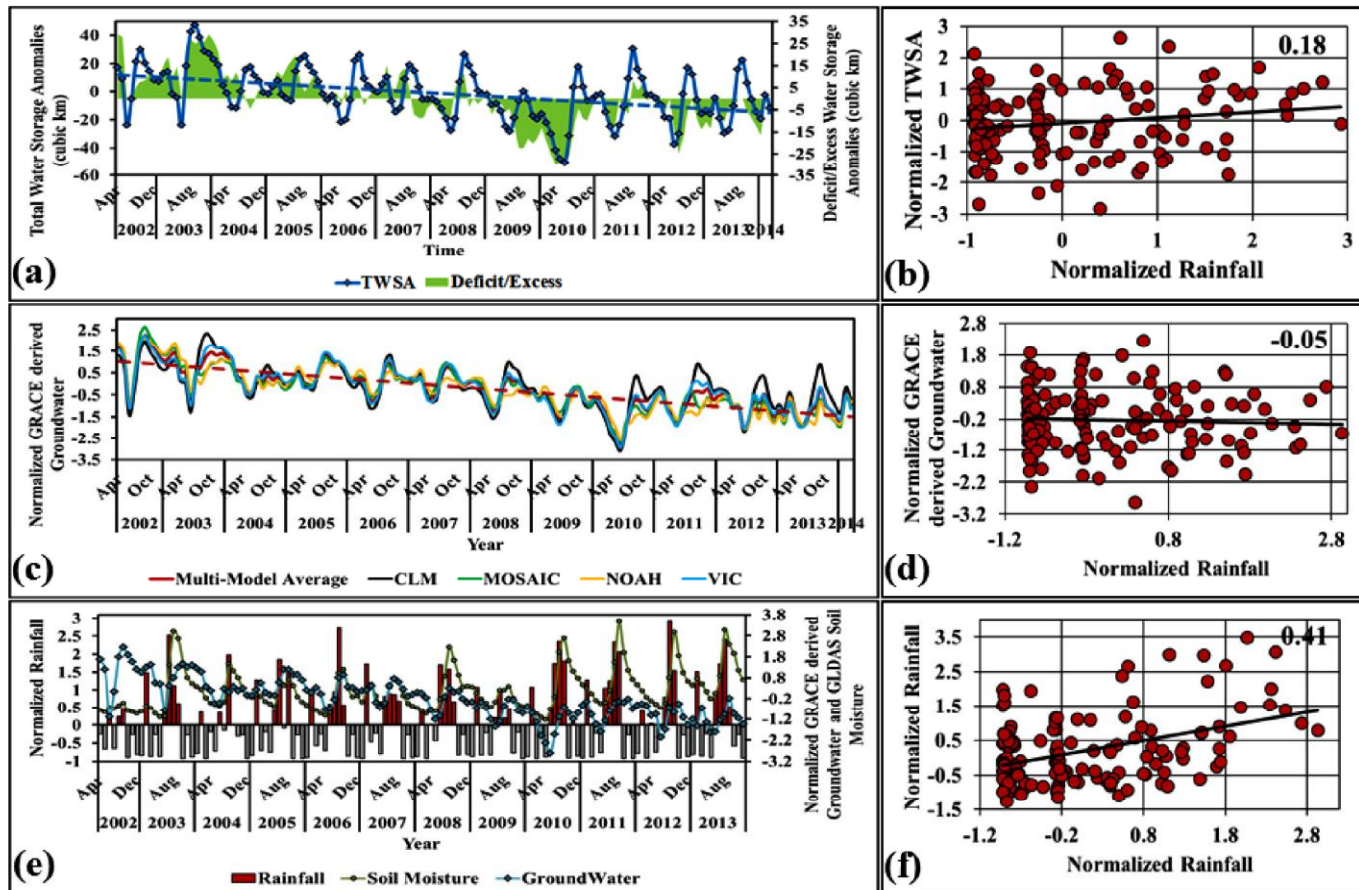

**Fig.S8. Groundwater scenario of North-West India.** (a) GRACE-derived total water storage anomaly. (b) Correlation between Rainfall and TWSA. (c) GRACE-GLDAS-derived groundwater storage anomaly. (d) Correlation between Rainfall and GRACE-derived groundwater storage anomaly. (e) Rainfall, GRACE-derived groundwater anomaly and GLDAS-derived soil moisture. (f) Correlation between Rainfall and GLDAS-derived soil moisture.



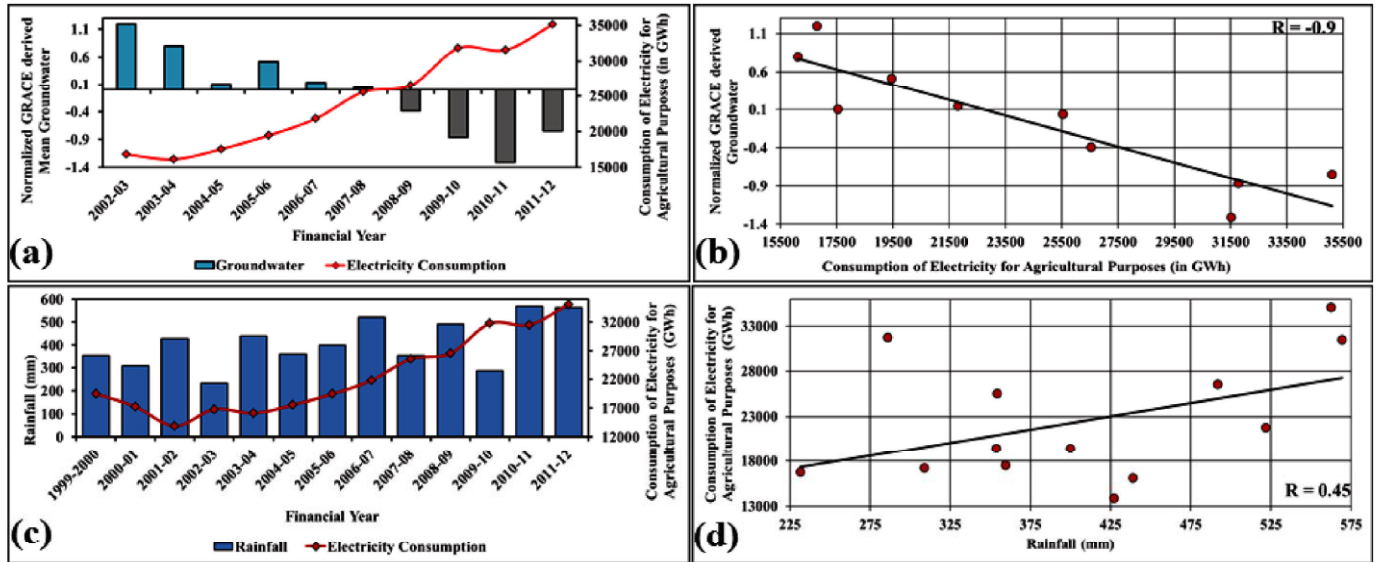

**Fig.S9. North-Western India groundwater storage anomaly and energy consumption.** (a) Electricity consumption for agricultural purpose and groundwater storage. (b) Scatter plot between electricity consumption for agricultural purpose and GRACE-derived groundwater storage anomaly. (c) Consumption of electricity for agricultural purposes and Rainfall. (d) Scatter plot between Rainfall and electricity consumption.

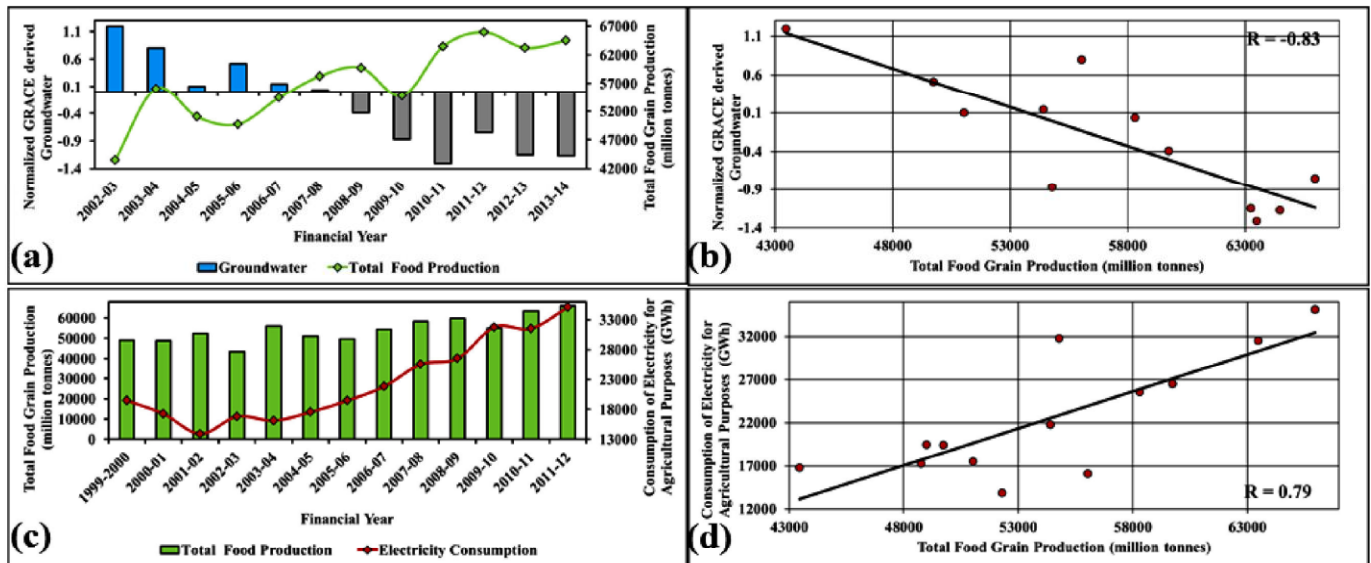

**Fig.S10. North-Western India food-groundwater-energy nexus.** (a) GRACE-derived groundwater storage anomaly and total food production. (b) Scatter plot between GRACE-derived groundwater storage anomaly and total food grain production. (c) Food grain production and electricity consumption for agricultural purposes. (d) Scatter plot between total food grain production and consumption of electricity for agricultural purposes.

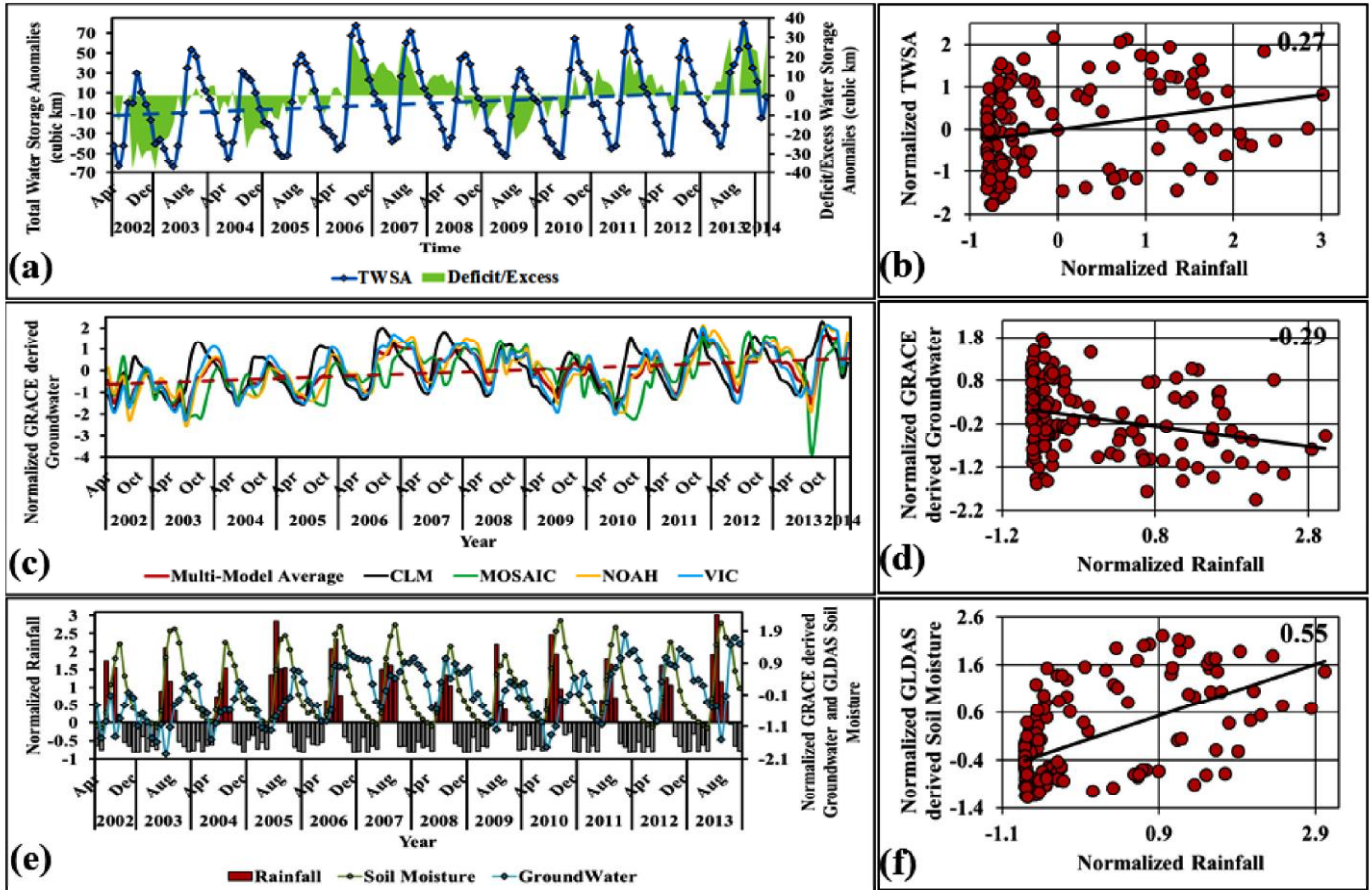

**Fig.S11. Groundwater scenario of West-Central India.** (a) GRACE-derived total water storage anomaly. (b) Correlation between Rainfall and TWSA. (c) GRACE-GLDAS-derived groundwater storage anomaly. (d) Correlation between Rainfall and GRACE-derived groundwater storage anomaly. (e) Rainfall, GRACE-derived groundwater anomaly and GLDAS-derived soil moisture. (f) Correlation between Rainfall and GLDAS-derived soil moisture.

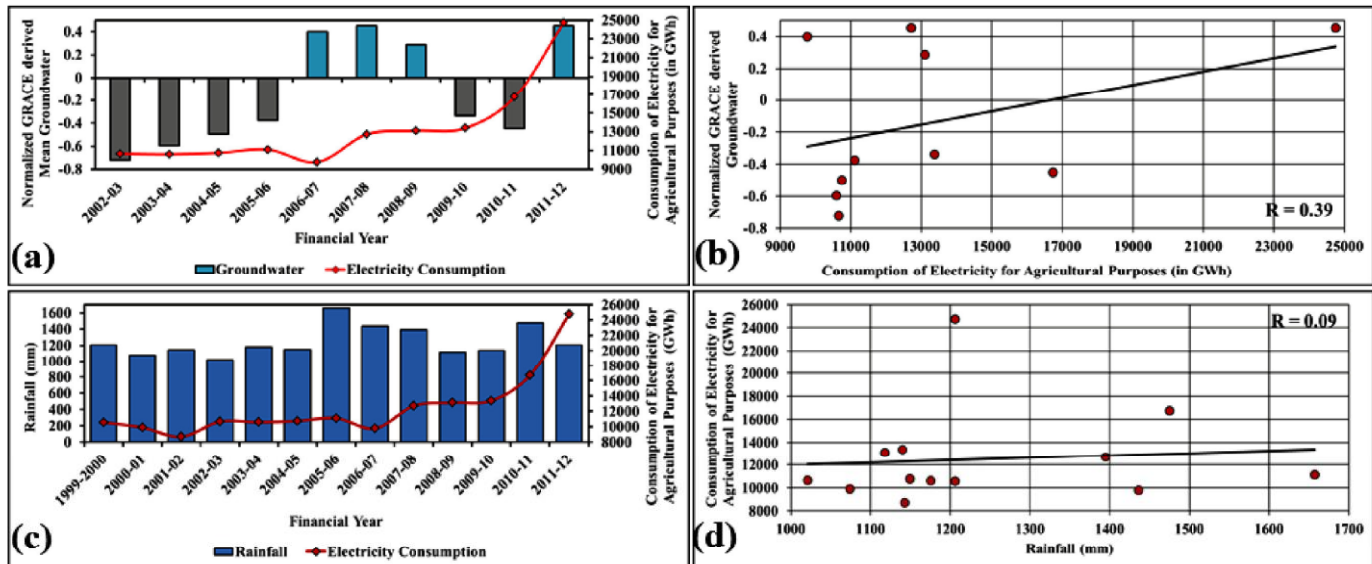

**Fig.S12. West-Central India groundwater storage anomaly and energy consumption.** (a) Electricity consumption for agricultural purpose and groundwater storage. (b) Scatter plot between electricity consumption for agricultural purpose and GRACE-derived groundwater storage anomaly. (c) Consumption of electricity for agricultural purposes and Rainfall. (d) Scatter plot between Rainfall and electricity consumption.

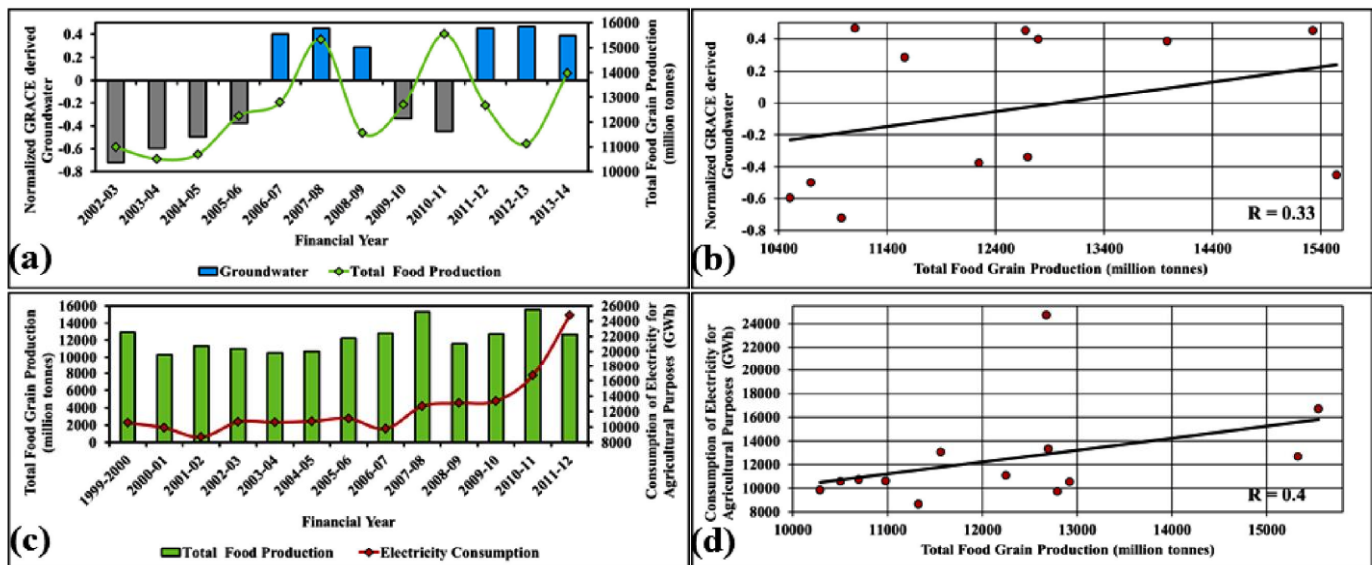

**Fig.S13. West-Central India food-groundwater-energy nexus.** (a) GRACE-derived groundwater storage anomaly and total food production. (b) Scatter plot between GRACE-derived groundwater storage anomaly and total food grain production. (c) Food grain production and electricity consumption for agricultural purposes. (d) Scatter plot between total food grain production and consumption of electricity for agricultural purposes.
